# Supplementary material for: Impact of Thinning on the Yield and Quality of <em>Eucalyptus grandis</em> Wood at Harvest Time
Source: Preprints.org preprint supplement (doi:10.20944/preprints202404.0233.v1), 2024-04-03
Supplement: Supplementary file 3 [file supplementary]

| Street | 550-300 | 700-300 | 550-300 | 700-350 |  |  |  |
| --- | --- | --- | --- | --- | --- | --- | --- |
| 700-400 | 400-200 | 400-150 | 400-100 |  |  |  |
| 400-150 | No thinning | 700-400 | 700-350 | 400-100 |  |  |
| 550-200 | 550-200 | 400-150 | 400-200 | No thinning | 550-250 |  |
| 550-200 | 700-300 | 400-200 | 550-250 | 700-300 | 400-100 |  |
| 700-400 |  |  | No thinning | 550-250 | 700-350 | 550-300 |

**Figure S1.** Diagram of plots distribution and the description of the number of trees per hectare in the first and second thinning of each plot.

**
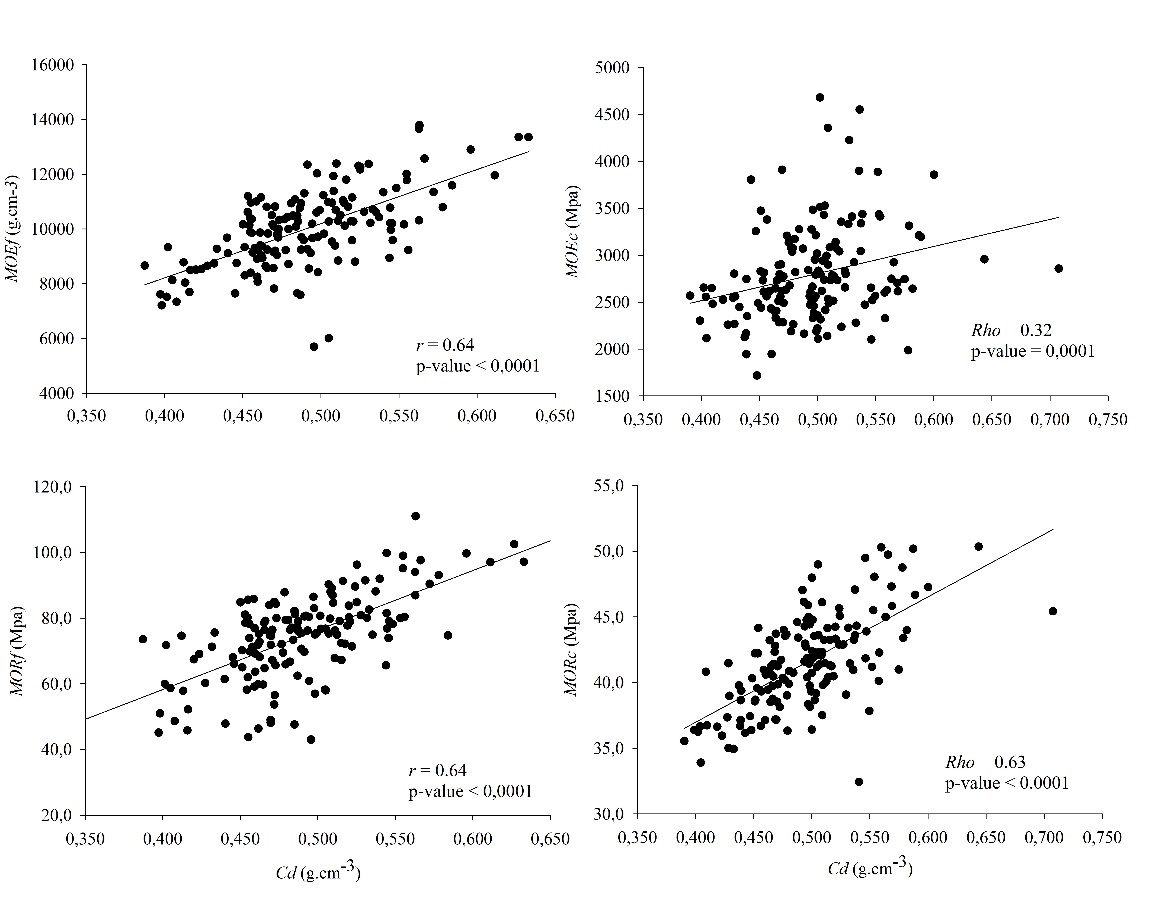
**

**Figure S2**. Scatter plots between *Cd* values versus mechanical parameters for all thinning schemes evaluated.


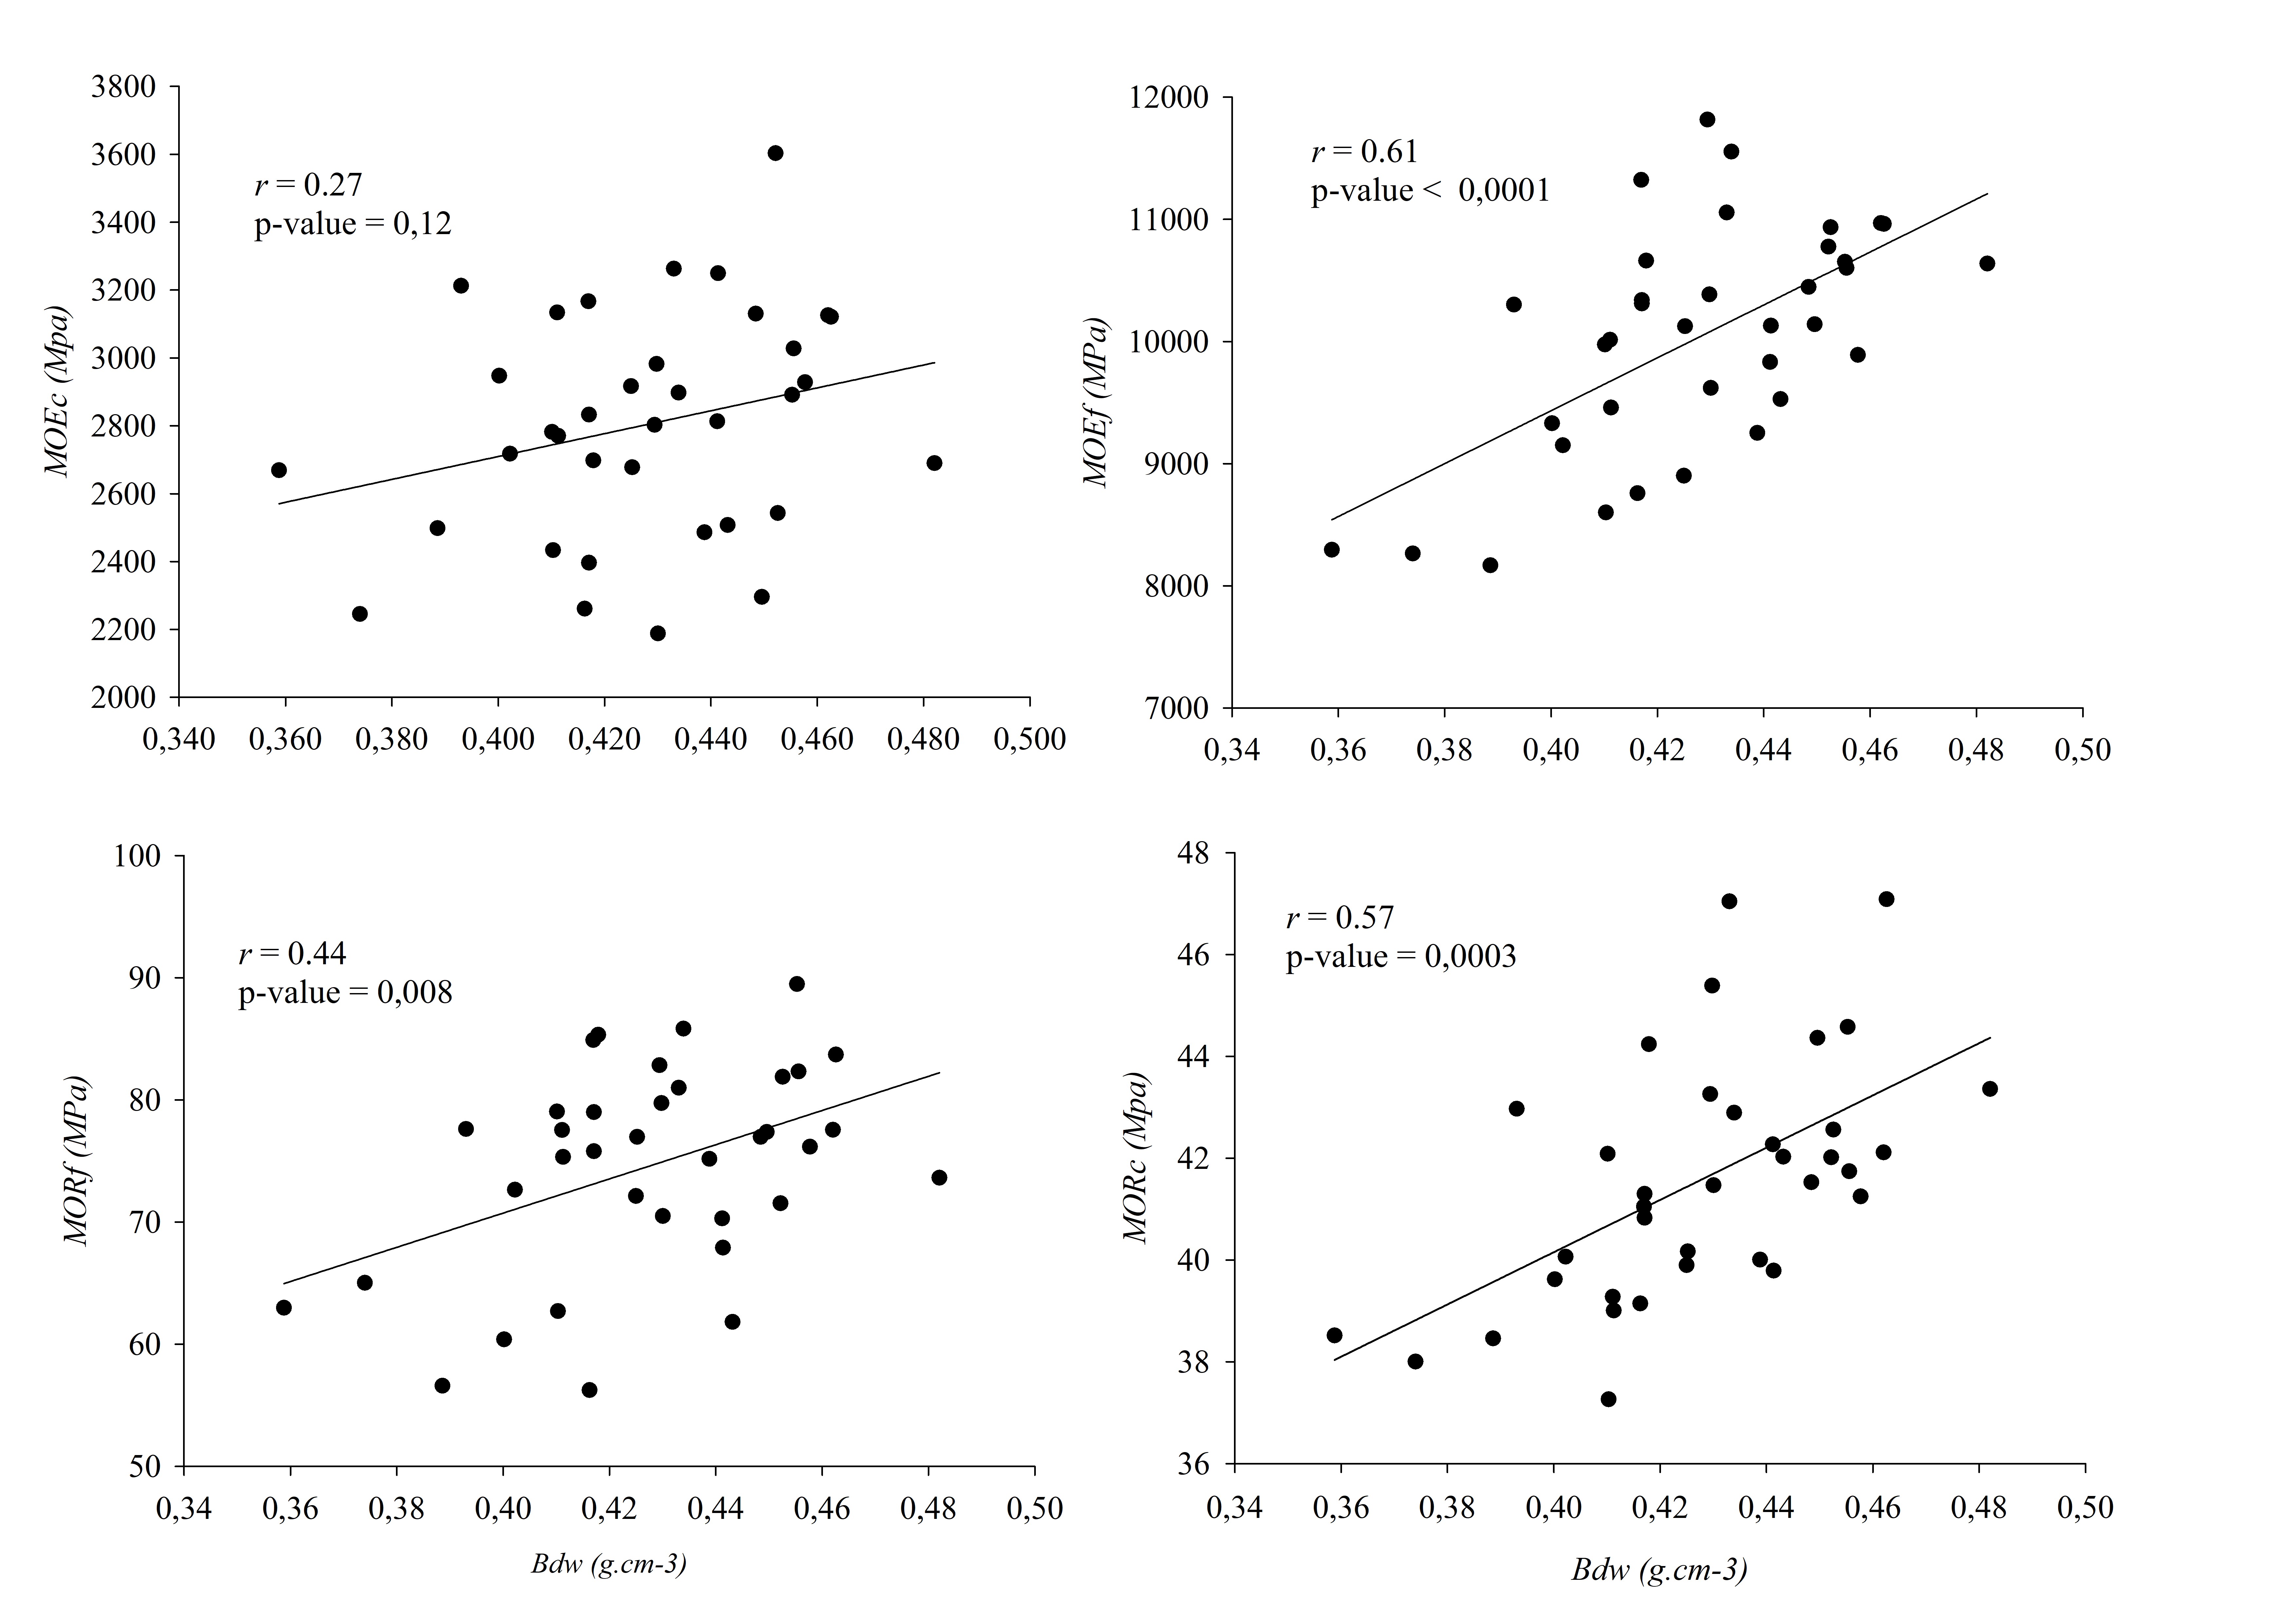


**Figure S3**. Scatter plots between *Bdw* values versus mechanical parameters for all thinning schemes evaluated.


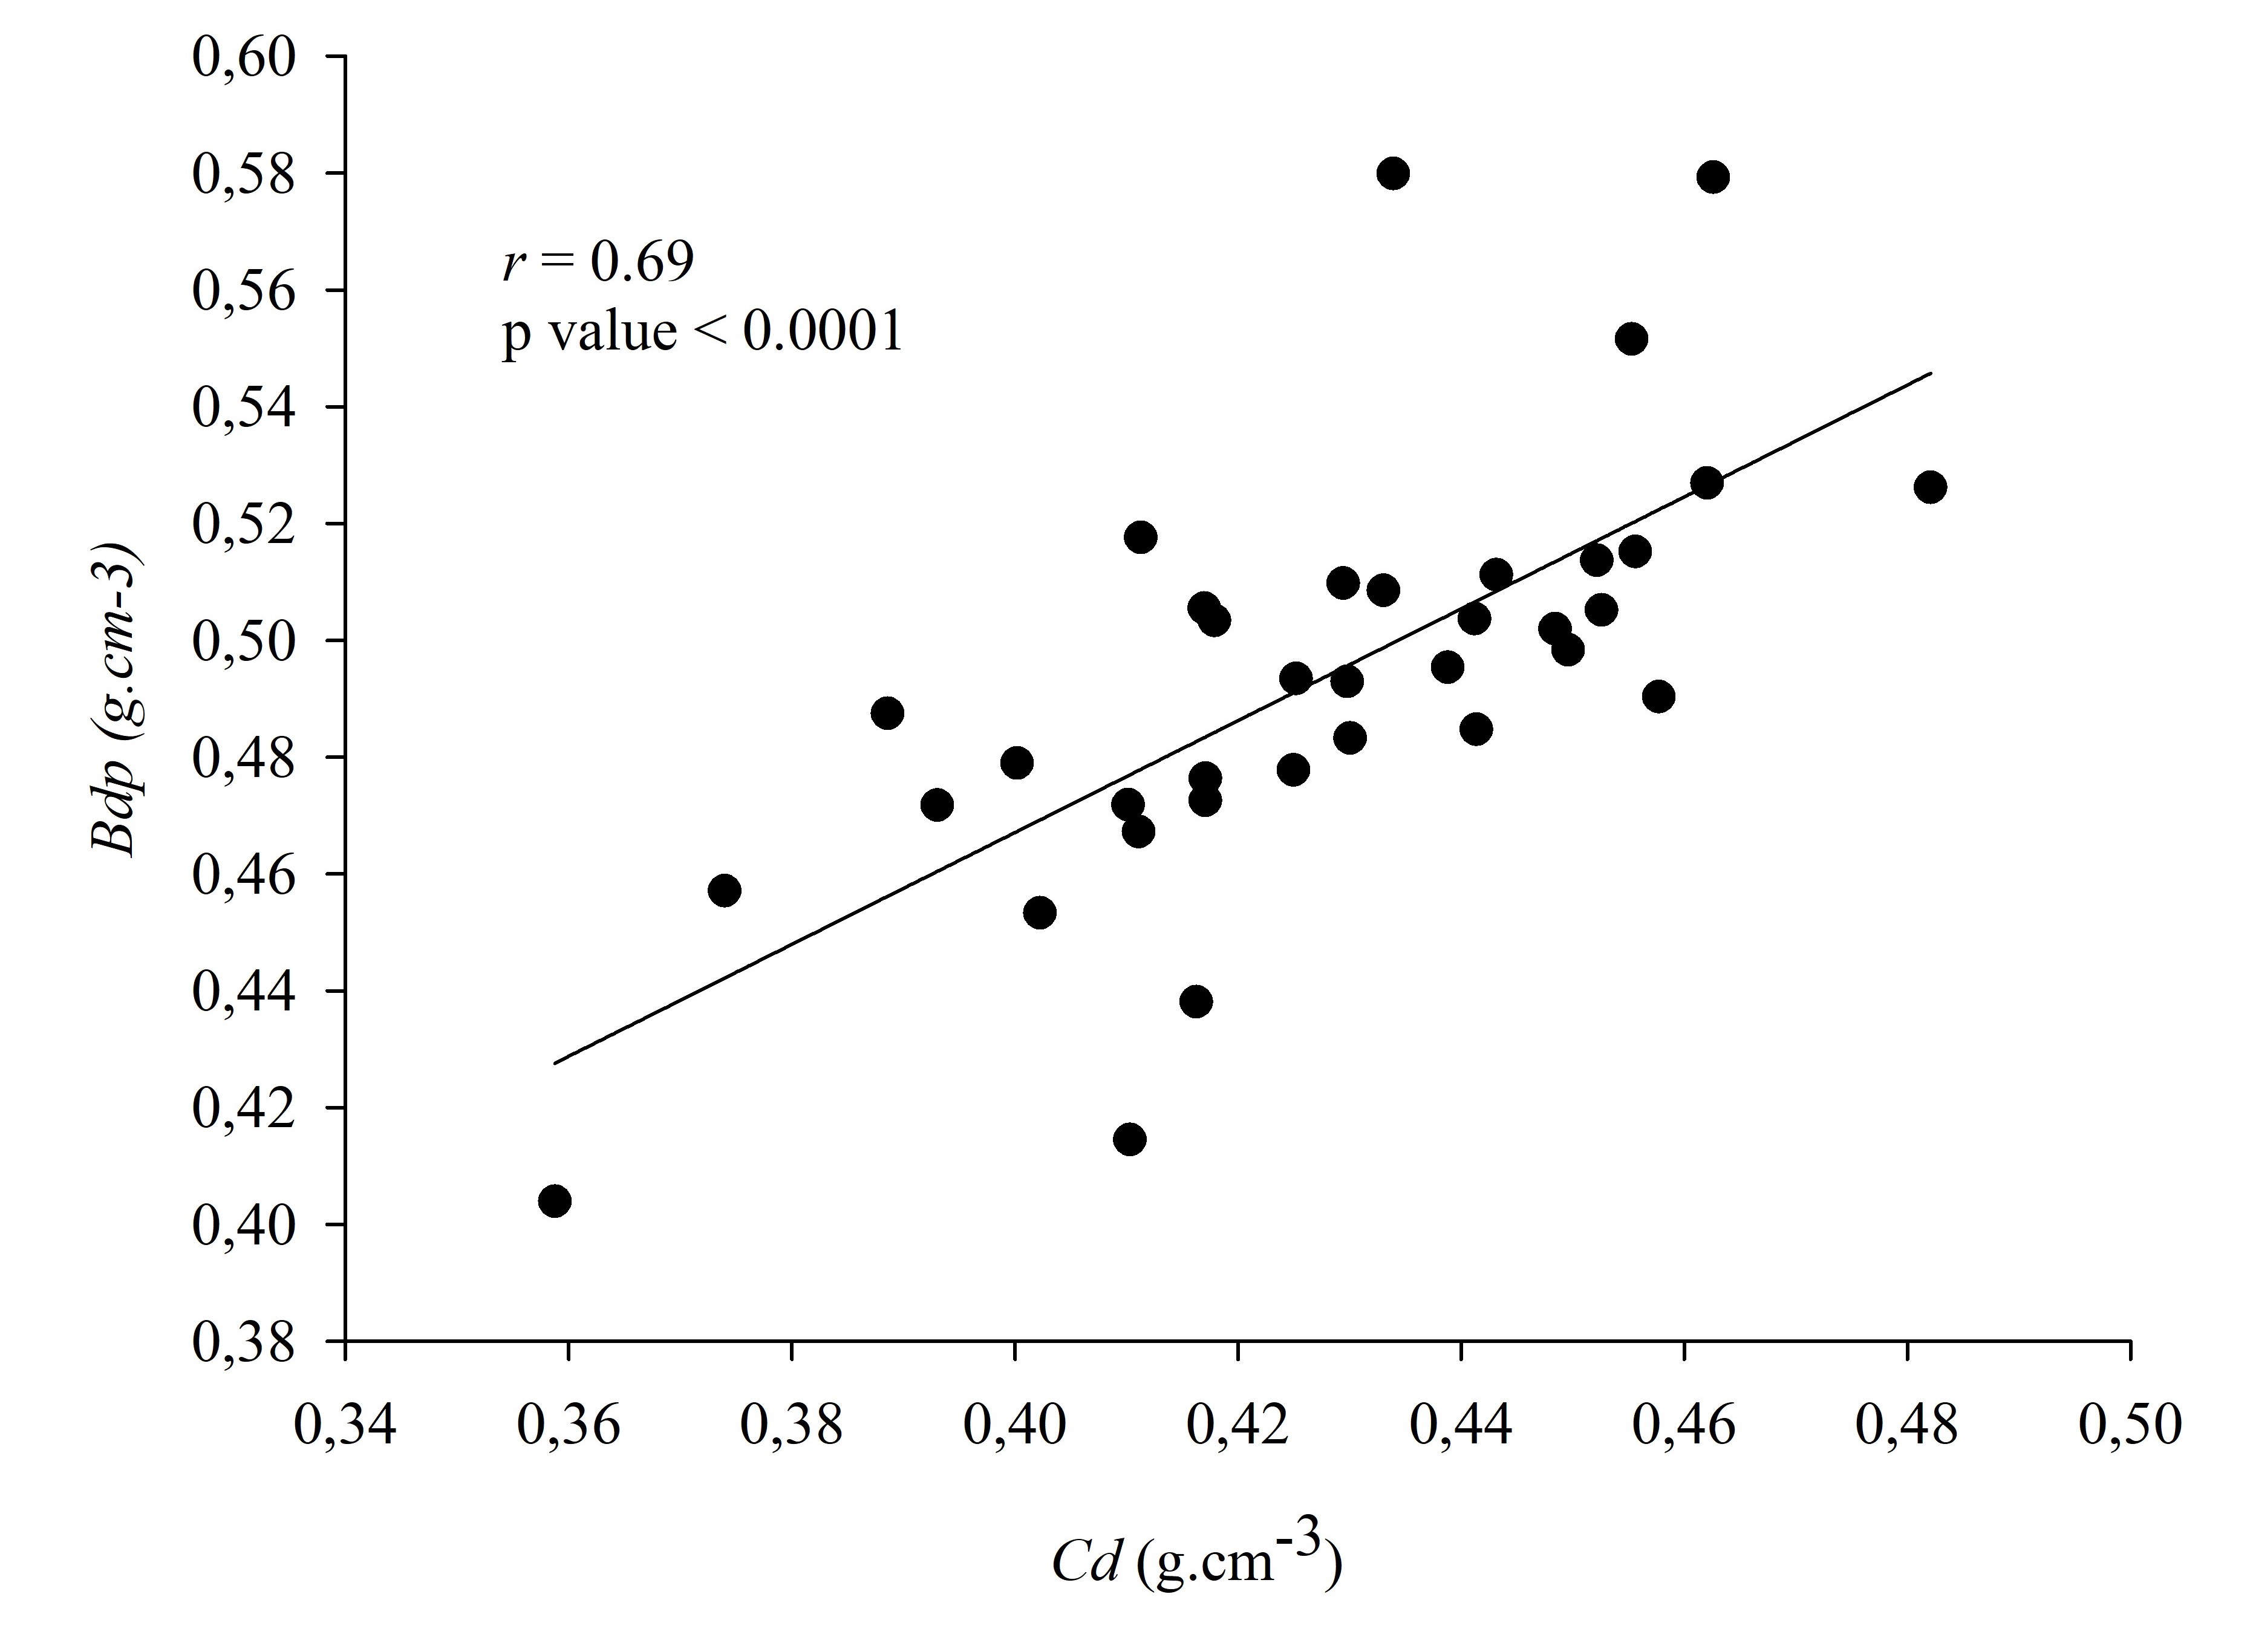


**Figure S4**. Scatter plot between the values of *Bdw* and *Cd* for all the thinning schemes evaluated.
